# Supplementary material for: Counterion binding on coacervation of dioctyl sulfosuccinate in aqueous sodium chloride
Source: Royal Society of Chemistry journal article supplement (doi:10.1039/c8sm02531b), 2019-01-01
Supplement: c8sm02531b1.pdf [file c8sm02531b1.pdf]

## Supporting information

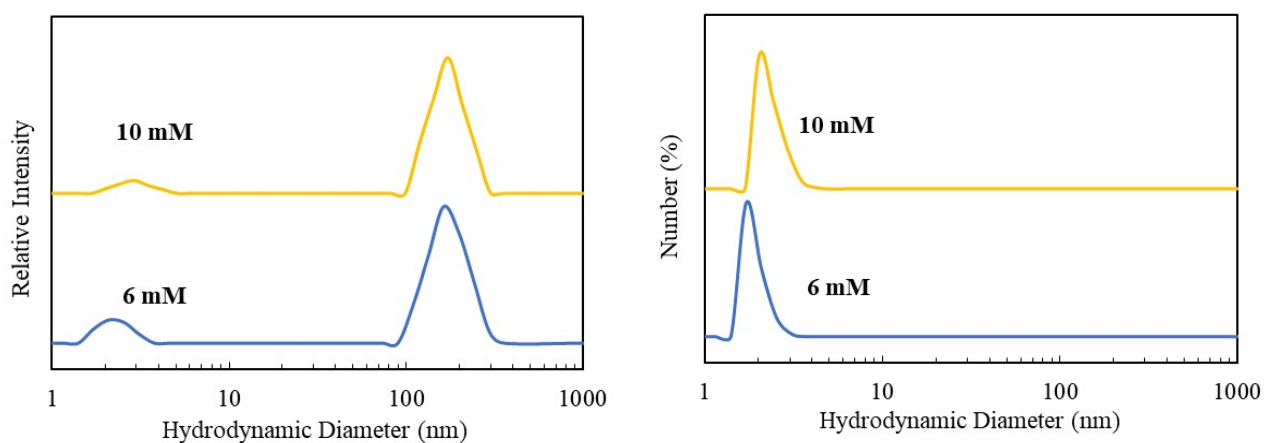

**Figure S1.** Size distributions of DOSS aggregates without additional NaCl at 25°C. Left, intensity size distributions; Right, number size distributions. Polydispersity is 0.312 for 6 mM DOSS, and 0.324 for 10 mM, CMC = 2.8 mM.
